# Supplementary material
Source: PubMed Central journal article supplement (PMC6802262)
Supplement: jamadermatol-155-1358-s001.pdf [file jamadermatol-155-1358-s001.pdf]

## Supplementary Online Content

Guttman-Yassky E, Diaz A, Pavel AB, et al. Use of tape strips to detect immune and barrier abnormalities in the skin of children with early-onset atopic dermatitis. *JAMA Dermatol*. Published October 9, 2019. doi:10.1001/jamadermatol.2019.2983

**eMethods 1.** Tape-Strip Collection

**eMethods 2.** RNA Extraction, Quality Control, and Quantitative Real-Time PCR

**eMethods 3.** Statistical Analysis

**eTable 1.** qRT-PCR Primers for 79 Immune and Barrier Mediators

**eTable 2.** Immunohistochemistry Antibodies

**eTable 3.** Summary of Past Tape-Strip Studies in Patients With Atopic Dermatitis

**eTable 4.** Means, Standard Errors, and Confidence Intervals for All Immune and Barrier Biomarkers

**eFigure 1.** Gene Expression of Inflammatory Biomarkers in Tape Strips

**eFigure 2.** Immune and Barrier AD Biomarkers Detected in Tape Strips

**eFigure 3.** Histology

**eFigure 4.** Expression of Biomarkers in Tape Strips Correlates With Clinical Severity

**eFigure 5.** Receiver Operating Characteristic Area Under the Curve (ROC AUC) in Tape Strips

**eReferences**

This supplementary material has been provided by the authors to give readers additional information about their work.

## **eMethods 1. Tape Strip Collection**

Each large D-Squame (D102) tape-strip was applied to the antecubital fossa when possible for lesional skin and nearby skin was sampled for non-lesional. Tape-strips were applied with pressure with the Cu-derm pressurizer device (D500). The pressure instrument has a plunger mechanism to ensure even/consistent pressure is applied to each tape-strip. After pressure is applied and released, tape-strips are moved by gloved hands and stuck onto the D-Squame Standard storage cards (D120). Using a pen, small marks were made on the skin after placement of the first tape-strip to ensure consistent placement of each subsequent tape-strip. Cards were immediately stored on dry ice in biohazard specimen bags and then transferred to a -80°C freezer until time for shipment.

## **eMethods 2.** RNA Extraction, Quality Control, and Quantitative Real-Time PCR

RNA was extracted for real-time polymerase chain reaction (RT-PCR) with the miRNAeasy Mini Kit (Qiagen, Hilden, Germany). Reverse transcription to complementary DNA (cDNA) from RNA was carried out using the High Capacity cDNA reverse transcription (Thermo fisher). TaqMan Low Density Array (TLDA) cards (Thermo fisher) were used for quantitative reverse transcription polymerase chain reaction (qRT-PCR). 500pg total RNA was used for PreAMP pool. Eukaryotic 18S recombinant RNA (rRNA) was used as an endogenous control. Expression values were normalized to *Rplp0*.

### **eMethods 3. Statistical Analysis**

Threshold cycles [Ct] were normalized to *Rplp0* by negatively transforming the Ct values to  $-dCt$ . The undetected expression values were estimated for each gene as 20% of the minimum expression across all samples. Log<sub>2</sub>-scale qRT-PCR expression data were modeled by a linear mixed effect model with biopsy type as a fixed effect and a random intercept for each patient. Means of each group were estimated using *lsmeans* and comparisons of interest were tested using contrast. Means and standard errors for each group and each marker are provided in eTable 4.

To evaluate the performance of an AD classifier we used Area Under the Receiver Operating Characteristic Curve (ROC AUC), in which the true positive rate (sensitivity) is plotted against the false positive rate (1-specificity) and each point represents a sensitivity/specificity corresponding to a decision threshold. The area under the curve (AUC) measures the classifier's discriminative ability, where a perfect classifier would have an AUC of 1 corresponding to 100% sensitivity and specificity.

**eTable 1.** qRT-PCR Primers for 79 Immune and Barrier Mediators

| Gene Symbol      | Assay ID      |
|------------------|---------------|
| CCL2             | Hs00234140_m1 |
| CCL3             | Hs00234142_m1 |
| CCL4             | Hs99999148_m1 |
| CCL11*           | HS00237013_m1 |
| CCL17            | Hs00171074_m1 |
| CCL18            | Hs00268113_m1 |
| CCL20            | Hs00355476_m1 |
| CCL22            | Hs01574247_m1 |
| CCL26            | Hs00171146_m1 |
| CCR4             | Hs99999919_m1 |
| CD3              | Hs00174158_m1 |
| CD11b            | Hs00167304_m1 |
| CD11c            | Hs00174217_m1 |
| CD25             | Hs00907779_m1 |
| CD28             | Hs01007422_m1 |
| CD83             | Hs00188486_m1 |
| CD123            | Hs00608141_m1 |
| CD209            | Hs01588349_m1 |
| CDSN             | Hs00169911_m1 |
| CERS3            | Hs00698859_m1 |
| CLDN1            | Hs00221623_m1 |
| CLDN8            | Hs04186769_s1 |
| CLDN23           | Hs01013638_s1 |
| CSF1             | Hs00174164_m1 |
| CSF2             | Hs00929873_m1 |
| CXCL1            | Hs00236937_m1 |
| CXCL9            | Hs00171065_m1 |
| CXCL10           | Hs01124252_g1 |
| CXCL11           | Hs00171138_m1 |
| DEFB4B           | Hs00823638_m1 |
| DGAT2            | Hs01045913_m1 |
| ELOVL3*          | Hs00537016_m1 |
| ELVOL5           | Hs01094711_m1 |
| FA2H             | Hs00757813_m1 |
| FAR2             | Hs00216461_m1 |
| FcεRI            | Hs00175408_m1 |
| FLG              | Hs00856927_g1 |
| FLG2             | Hs00418578_m1 |
| FOXP3            | Hs01085834_m1 |
| IFN <sub>γ</sub> | Hs00989291_m1 |
| IL1 <sub>α</sub> | Hs00174092_m1 |
| IL1 <sub>β</sub> | Hs00174097_m1 |
| IL-1RA           | Hs00893626_m1 |
| IL-2             | Hs00174114_m1 |
| IL-4             | Hs00174122_m1 |
| IL4R             | Hs00965056_m1 |
| IL-6             | Hs00985639_m1 |
| IL-8             | Hs00174103_m1 |
| IL-10            | Hs00961622_m1 |
| IL-12/IL-23p40   | Hs01011518_m1 |
| IL-13            | Hs00174379_m1 |
| IL17C            | Hs00171163_m1 |
| IL-19            | Hs00604657_m1 |
| IL-23p19         | Hs00900828_g1 |
| IL-33            | Hs04931857_m1 |

|          |               |
|----------|---------------|
| IL-34    | Hs01050926_m1 |
| IL-36G   | Hs00219742_m1 |
| IL-37    | Hs00367201_m1 |
| ICOS     | Hs00359999_m1 |
| K16      | Hs00955082_g1 |
| KLK5     | Hs01548153_m1 |
| KLK7     | Hs00192503_m1 |
| Langerin | Hs00210453_m1 |
| LL37     | Hs00189038_m1 |
| LOR      | Hs01894962_s1 |
| MMP12    | Hs00159178_m1 |
| MX1      | Hs00895608_m1 |
| OX40L    | Hs04400731_m1 |
| PI3      | Hs00160066_m1 |
| PPL      | Hs00160312_m1 |
| PSORS1C2 | Hs00204152_m1 |
| S100A7   | Hs01923188_u1 |
| S100A8   | Hs00374264_g1 |
| S100A9   | Hs00610058_m1 |
| S100A12  | Hs00942835_g1 |
| SCD      | Hs01682761_m1 |
| SERPINB3 | Hs00199468_m1 |
| STAT1    | Hs01013996_m1 |
| STAT3    | Hs00374280_m1 |

qRT-PCR, quantitative real-time polymerase chain reaction; \*Markers that were evaluated, but not detected in tape-strips.

**eTable 2.** Immunohistochemistry Antibodies

| <b>Antigen</b> | <b>Manufacturer</b> | <b>Clone</b> | <b>Isotype</b> | <b>Dilution</b> |
|----------------|---------------------|--------------|----------------|-----------------|
| CD11b          | BD Pharmingen       | Mouse        | IgG1           | 1:50            |
| IL-33          | ThermoFisher        | Mouse        | IgG1           | 1:2,000         |
| IL-17C         | LSBio               | Rabbit       | IgG            | 1:100           |

**eTable 3.** Summary of Past Tape-Strip Studies in Patients With Atopic Dermatitis

| Reference                                           | Markers/content evaluated                                                                                                                                            | No. of mediators detected/evaluated | Analysis method                             | Type: No. of tape-strips used for analysis/total collected | No. of subjects                  | Age group (years) | Tissue evaluated |
|-----------------------------------------------------|----------------------------------------------------------------------------------------------------------------------------------------------------------------------|-------------------------------------|---------------------------------------------|------------------------------------------------------------|----------------------------------|-------------------|------------------|
| <b>Evaluation of immune mediators and receptors</b> |                                                                                                                                                                      |                                     |                                             |                                                            |                                  |                   |                  |
| Leung et al., 2019                                  | CCR8, IL-4R, CRLF2, CCL17, CCL22, IL-13, IL-7R, etc.                                                                                                                 | 96/218 <sup>a</sup>                 | RNA Ampliseq Transcriptome sequencing       | D-Squame: 11-20/30                                         | AD LS: 40<br>AD NL: 40<br>HC: 22 | 8-16              | LS, NL, N        |
| Berdyshev et al., 2018                              | ELOVL 1-7, IL-13, IL-4R                                                                                                                                              | NA                                  | RNA Ampliseq Transcriptome sequencing       | D-Squame: 11-20/20                                         | AD LS: 15<br>AD NL: 30<br>HC: 25 | ≥18               | LS, NL, N        |
|                                                     |                                                                                                                                                                      |                                     |                                             |                                                            |                                  |                   |                  |
| Dyjack et al., 2018                                 | CYSLTR1, SPRR2F, MMP9, MMP10, etc.                                                                                                                                   | 29 <sup>b</sup>                     | RNA AmpliSeq whole-transcriptome sequencing | D-Squame: 11-20/20                                         | AD: 30<br>HC: 25                 | ≥18               | LS, NL, N        |
| Hulshof et al., 2018                                | IL-1 $\alpha$ , IL-1 $\beta$ , IL-18, IL-13, IL-14, CCL2, CCL4, CXCL8, CXCL10, CCL11, CCL13, CCL17, CCL22, etc.                                                      | 13/28                               | MESO QuickPlex SQ 120 Assay                 | D-Squame: 5 <sup>th</sup> or 6 <sup>th</sup> /6            | AD: 53<br>HC: 50                 | <12               | LS, NL, N        |
| McAleer et al., 2018                                | IL-1 $\alpha$ , IL-1 $\beta$ , IL-2, IL-5, IL-7, IL-8, IL-12/IL-23p40, IL-13, IL-15, IL-16, IL-17A, IL-18, CSF2, CCL2, CCL3, CCL4, CCL13, CCL17, CCL22, CXCL10, etc. | 19/27                               | MESO QuickPlex SQ 120 Assay                 | D-Squame: 5 <sup>th</sup> /8                               | AD: 66<br>HC: 13                 | <1                | NL, N            |
|                                                     |                                                                                                                                                                      |                                     |                                             |                                                            |                                  |                   |                  |
| Tham et al., 2018                                   | OR10G7, ORs, etc.                                                                                                                                                    | 381                                 | RNA Ampliseq transcriptome sequencing       | D-Squame: 11-20/20                                         | AD: 30<br>HC: 25                 | ≥18               | LS, NL, N        |
| Koppes et al., 2016                                 | CSF2, IFN $\gamma$ , IL-1 $\alpha$ , IL-1 $\beta$ , IL-2, IL-4, IL-5, IL-8, IL-10, IL-12/IL-23p40, IL-13, IL-16, IL-17a, CCL2, CCL3, CCL4, CCL11,                    | 24/38                               | MESO QuickPlex SQ 120 assay                 | D-Squame: 6 <sup>th</sup> /8                               | AD: 90<br>HC: 20                 | ≥18               | LS, NL, N        |



|                                                                           |                                                                   |                                            |                                                             |                                                                   |                                     |                          |                         |
|---------------------------------------------------------------------------|-------------------------------------------------------------------|--------------------------------------------|-------------------------------------------------------------|-------------------------------------------------------------------|-------------------------------------|--------------------------|-------------------------|
|                                                                           | CCL13, CCL22, CCL17, etc.                                         |                                            |                                                             |                                                                   |                                     |                          |                         |
| Amarbayasgalan et al., 2013                                               | IL-8, IL-18, VEGF, TGF- $\alpha$                                  | 4                                          | ELISA                                                       | Cellotape: 1/1                                                    | AD: 50<br>HC: 12                    | $\geq 18$                | LS, NL, N               |
| Morita et al., 2010                                                       | CCL17                                                             | 1                                          | TARC-specific antibody                                      | Cellotape: 1/1                                                    | AD: 61<br>HC: 19                    | $\geq 17$                | LS, N                   |
| <b>Evaluation of proteins/stratum corneum integrity/lipid composition</b> |                                                                   |                                            |                                                             |                                                                   |                                     |                          |                         |
| Berdyshev et al., 2018                                                    | Short-chain ceramides, SMs, LPCs                                  | NA                                         | HPLC-ESI-MS;                                                | D-Squame: 5 <sup>th</sup> and 6 <sup>th</sup> /20                 | AD LS: 15<br>AD NL: 30<br>HC: 25    | $\geq 18$                | LS, NL, N               |
| Clausen et al., 2018                                                      | hBD-2, hBD-3, RNase 7, psoriasin, LL37                            | 4/5                                        | ELISA                                                       | D-Squame: pooled in groups of 5/35                                | AD: 9<br>HC: 5                      | $\geq 18$                | LS, NL, N               |
| Dapic et al., 2018                                                        | FFAs                                                              | NA                                         | LC-ESI-MS                                                   | D-Squame: 4-9/9                                                   | AD: 6<br>HC: 4                      | $\geq 1$                 | LS, N                   |
| <b>Reference</b>                                                          | <b>Markers/content evaluated</b>                                  | <b>No. of mediators detected/evaluated</b> | <b>Analysis method</b>                                      | <b>Type: No. of tape-strips used for analysis/total collected</b> | <b>No. of subjects</b>              | <b>Age group (years)</b> | <b>Tissue evaluated</b> |
| Reisdorph et al., 2018                                                    | $\alpha$ -enolase, FLG2, FLG1, SERPINB3, etc.                     | 14peptides/7proteins                       | Tandem mass spectrometry                                    | D-Squame: 10/20                                                   | AD: 6<br>HC: 6                      | $\geq 18$                | LS, N                   |
| Clausen et al., 2016                                                      | Cumulative soluble and total protein                              | NA                                         | Squame Scan, Micro BCA protein determination kit            | D-Squame: pooled in groups of 5/35                                | AD: 9<br>HC: 5                      | $\geq 18$                | LS, NL, N               |
| Leitch et al., 2016                                                       | TEWL                                                              | NA                                         | Tewameter TM300                                             | D-Squame: ~10-40                                                  | AD: 58<br>HC: 26                    | $\geq 18$                | LS, N                   |
| Winget et al., 2016                                                       | SERPINA3, SERPINB3, SERPINB5, Keratins, FLG-2, etc.               | 252/1102 <sup>c</sup>                      | Mass spectrometry                                           | D-Squame: 8/8                                                     | AD: 11<br>HC: 17                    | $\geq 18$                | LS, NL, N               |
| Riethmuller et al., 2015                                                  | NMFs, corneocytes                                                 | NA                                         | HPLC; AFM                                                   | D-Squame: 5 <sup>th</sup> ; 7 <sup>th</sup> /8                    | AD: 15                              | <3                       | LS                      |
| Clausen et al., 2013                                                      | hBD-2, total protein                                              | 1                                          | ELISA, Micro BCA Protein Assay                              | D-Squame: 2-16/16                                                 | AD: 25<br>HC: 11                    | $\geq 18$                | LS, NL, N               |
| Janssens et al., 2012                                                     | Ceramide composition and lipid organization                       | NA                                         | Mass spectrometry, infrared spectroscopy, X-ray diffraction | D-Squame: 6-9/9                                                   | AD: 15<br>HC: 28                    | $\geq 18$                | NL, N                   |
| Angelova-Fischer et al., 2011                                             | SC integrity/cohesion, epidermal barrier recovery, lipid analysis | NA                                         | Tewameter TM300, Squame Scan; Large Finn Chamber; AMD-HPTLC | D-Squame: 2, 10, 20, 30 /30                                       | AD: 37/25<br>HC: 20/18 <sup>d</sup> | $\geq 18$                | LS, NL, N               |

|                        |                                                                       |    |                      |                                     |                  |           |           |
|------------------------|-----------------------------------------------------------------------|----|----------------------|-------------------------------------|------------------|-----------|-----------|
| Kezic et al., 2011     | NMFs                                                                  | NA | HPLC                 | D-Squame: 2-5 /5                    | AD: 96<br>HC: 24 | <18       | NL, N     |
| Broccardo et al., 2009 | $\alpha$ -enolase, SERPINB3, dermcidin, etc.                          | 53 | HPLC                 | D-Squame: pooled in groups of 5/20  | AD: 5<br>HC: 5   | $\geq$ 18 | LS, NL, N |
| Voegeli et al., 2009   | SC tryptase-like enzyme, KLK5, KLK7, etc; Total protein, SC integrity | 6  | Squame Scan, RP-HPLC | D-Squame: pooled in groups of 5 /20 | AD: 12<br>HC: 6  | $\geq$ 18 | LS, NL, N |

*LPC*, lysophosphatidylcholines; *SMs*, sphingomyelins; *ELOVL 1-7*, elongases 1-7 ; *HPLC-ESI-MS*, High Performance Liquid chromatography-electrospray ionization-tandem mass spectrometry; *FFAs*, free fatty acids; *hBD-2*, human beta defensin-2; *hBD-3*, human beta defensin-3; *CSF*, colony-stimulating factor; *FLG*, filaggrin; *ORs*, olfactory receptors ; *VEGF*, vascular endothelial growth factor; *TGF- $\alpha$* , transforming growth factor-alpha; *NMFs*, natural moisturizing factors; *SC*, stratum corneum; *HPLC*, High-performance liquid chromatography; *AMD-HPTLC*, Automated development high-performance thin layer chromatography; *AFM*, Atomic force microscopy; *RP-HPLC*, reverse-phase high-performance liquid chromatography; *TARC*, thymus and activation-regulated chemokine; *AD*, atopic dermatitis; *HC*, healthy controls; *LS*, lesional; *NL*, non-lesional; *N*, normal; *NA*, not applicable; <sup>a</sup>Differentially expressed genes within nonlesional tape strips of patients with AD and food allergies/FA+, those without AD FA-, and non-atopics; yielded a set of 288 genes that separated patients from controls (n=51), those with AD FA- (n=19), and those with AD FA+ (n=218); AD FA+ enriched genes overlapped with gene signature previously identified in patients with type 2 high AD (n=96/218); <sup>b</sup>29 differentially expressed genes were identified between nonlesional AD and healthy controls, 656 differentiated genes were expressed in analysis of nonlesional skin RNA transcripts of AD patients exhibiting a type 2 high AD endotype (n=9) and patients with AD not exhibiting the type 2 immune-activation signature (n=9), i.e CCR4, CCL22, CD80, CD86, CD28, CD3, etc.; <sup>c</sup>252 proteins were differentially observed between healthy and AD samples, combining all spectral evidence 1,102 proteins were identified at a 1% false positive error rate;<sup>d</sup>37AD patients (14 patients with filaggrin-AD and 23 patients with non-filaggrin AD) and 20 healthy controls participated in assessment of epidermal barrier function and stratum corneum integrity/cohesion, 25 AD patients and 18 healthy controls volunteered for monitoring of the epidermal barrier recovery.

**eTable 4.** Means, Standard Errors, and Confidence Intervals for All Immune and Barrier Biomarkers

|                 | Normal mean | Normal SE | Normal CI Lower | Normal CI Upper | NL AD mean | NL AD SE | NL AD CI Lower | NL AD CI Upper | LS AD mean | LS AD SE | LS AD CI Lower | LS AD CI Upper |
|-----------------|-------------|-----------|-----------------|-----------------|------------|----------|----------------|----------------|------------|----------|----------------|----------------|
| <b>MMP12</b>    | -1.779      | 0.707     | -2.486          | -1.071          | 2.003      | 0.303    | 1.701          | 2.306          | 2.226      | 0.343    | 1.883          | 2.568          |
| <b>PI3</b>      | -0.438      | 0.426     | -0.864          | -0.012          | 0.135      | 0.482    | -0.346         | 0.617          | 0.455      | 0.711    | -0.256         | 1.166          |
| <b>PPL</b>      | -0.238      | 0.298     | -0.536          | 0.061           | -2.710     | 0.392    | -3.102         | -2.318         | -3.299     | 0.697    | -3.996         | -2.602         |
| <b>CD11b</b>    | -7.824      | 0.968     | -8.792          | -6.856          | -4.636     | 0.884    | -5.520         | -3.751         | -2.599     | 0.738    | -3.336         | -1.861         |
| <b>CDSN</b>     | 3.648       | 0.341     | 3.307           | 3.988           | 1.996      | 0.520    | 1.476          | 2.516          | 1.970      | 0.807    | 1.163          | 2.777          |
| <b>CXCL10</b>   | -13.970     | 1.046     | -15.015         | -12.924         | -          | 0.664    | -              | -              | -          | 1.004    | -              | -              |
|                 |             |           |                 |                 | 15.234     |          | 15.898         | 14.570         | 13.052     |          | 14.056         | 12.048         |
| <b>CXCL9</b>    | -8.843      | 1.320     | -10.163         | -7.522          | -          | 1.313    | -              | -9.038         | -8.656     | 1.419    | -              | -7.237         |
|                 |             |           |                 |                 | 10.351     |          | 11.664         |                |            |          | 10.075         |                |
| <b>CCL17</b>    | -2.676      | 0.788     | -3.464          | -1.887          | 1.762      | 0.303    | 1.459          | 2.065          | 1.544      | 0.712    | 0.833          | 2.256          |
| <b>CXCL11</b>   | -11.265     | 0.835     | -12.100         | -10.430         | -          | 0.652    | -              | -              | -          | 0.846    | -              | -              |
|                 |             |           |                 |                 | 12.512     |          | 13.163         | 11.860         | 11.585     |          | 12.430         | 10.739         |
| <b>CCL26</b>    | -19.113     | 0.000     | -19.113         | -19.113         | -          | 1.115    | -              | -              | -          | 1.206    | -              | -              |
|                 |             |           |                 |                 | 15.153     |          | 16.268         | 14.038         | 13.466     |          | 14.672         | 12.260         |
| <b>CSF1</b>     | -4.542      | 0.675     | -5.217          | -3.867          | -2.502     | 0.559    | -3.060         | -1.943         | -1.322     | 0.515    | -1.837         | -0.806         |
| <b>CD11c</b>    | -4.004      | 0.782     | -4.786          | -3.222          | -1.906     | 0.270    | -2.175         | -1.636         | -1.701     | 0.650    | -2.352         | -1.051         |
| <b>FcεRI</b>    | -2.494      | 0.697     | -3.191          | -1.797          | -0.277     | 0.268    | -0.545         | -0.008         | 0.081      | 0.619    | -0.538         | 0.700          |
| <b>LL37</b>     | -15.628     | 0.928     | -16.555         | -14.700         | -          | 1.444    | -              | -              | -9.927     | 1.410    | -              | -8.517         |
|                 |             |           |                 |                 | 11.809     |          | 13.252         | 10.365         |            |          | 11.336         |                |
| <b>SERPINB3</b> | -0.649      | 0.473     | -1.123          | -0.176          | 2.718      | 0.433    | 2.286          | 3.151          | 3.090      | 0.548    | 2.542          | 3.639          |
| <b>PSORS1C2</b> | -3.707      | 0.622     | -4.330          | -3.085          | -6.781     | 1.089    | -7.870         | -5.692         | -6.507     | 0.924    | -7.431         | -5.584         |
| <b>CD207</b>    | -12.087     | 0.789     | -12.876         | -11.297         | -6.260     | 0.901    | -7.161         | -5.359         | -5.886     | 0.883    | -6.769         | -5.004         |
| <b>CLDN1</b>    | -2.925      | 0.737     | -3.661          | -2.188          | -0.423     | 0.292    | -0.715         | -0.130         | -0.587     | 0.383    | -0.970         | -0.204         |
| <b>CCL2</b>     | -12.044     | 0.811     | -12.855         | -11.232         | -9.657     | 0.929    | -              | -8.727         | -8.013     | 0.818    | -8.831         | -7.194         |
|                 |             |           |                 |                 |            |          | 10.586         |                |            |          |                |                |
| <b>CCL3</b>     | -2.764      | 0.696     | -3.460          | -2.068          | -2.316     | 0.560    | -2.876         | -1.756         | -1.108     | 0.743    | -1.851         | -0.364         |
| <b>CXCL1</b>    | -4.663      | 0.798     | -5.461          | -3.866          | -3.049     | 1.122    | -4.171         | -1.927         | -0.902     | 0.824    | -1.726         | -0.078         |
| <b>CCL11</b>    | -15.954     | 0.000     | -15.954         | -15.954         | -          | 0.245    | -              | -              | -          | 0.364    | -              | -              |
|                 |             |           |                 |                 | 15.600     |          | 15.845         | 15.356         | 15.434     |          | 15.797         | 15.070         |
| <b>CCL18</b>    | -15.982     | 1.185     | -17.167         | -14.797         | -          | 1.214    | -              | -              | -          | 1.224    | -              | -              |
|                 |             |           |                 |                 | 11.699     |          | 12.913         | 10.485         | 11.736     |          | 12.960         | 10.511         |
| <b>CCL20</b>    | -10.757     | 0.781     | -11.539         | -9.976          | -6.579     | 0.707    | -7.285         | -5.872         | -6.013     | 0.580    | -6.593         | -5.433         |
| <b>S100A8</b>   | -0.712      | 0.357     | -1.069          | -0.355          | 1.168      | 0.380    | 0.789          | 1.548          | 1.233      | 0.628    | 0.604          | 1.861          |
| <b>STAT3</b>    | -4.071      | 0.366     | -4.437          | -3.706          | -3.347     | 0.298    | -3.645         | -3.049         | -2.653     | 0.657    | -3.310         | -1.996         |
| <b>FLG2</b>     | 1.651       | 0.402     | 1.249           | 2.053           | -1.466     | 0.670    | -2.136         | -0.796         | -3.100     | 0.698    | -3.799         | -2.402         |
| <b>ELOVL3</b>   | -17.423     | 0.810     | -18.233         | -16.612         | -          | 0.249    | -              | -              | -          | 0.725    | -              | -              |
|                 |             |           |                 |                 | 19.002     |          | 19.251         | 18.753         | 18.045     |          | 18.770         | 17.320         |
| <b>S100A9</b>   | 1.191       | 0.362     | 0.830           | 1.553           | 2.918      | 0.302    | 2.616          | 3.220          | 3.291      | 0.519    | 2.772          | 3.810          |
| <b>FA2H</b>     | -5.414      | 1.108     | -6.522          | -4.307          | -          | 1.398    | -              | -              | -          | 1.112    | -              | -              |
|                 |             |           |                 |                 | 12.869     |          | 14.267         | 11.471         | 15.917     |          | 17.029         | 14.804         |
| <b>DEFB4B</b>   | -2.831      | 0.722     | -3.553          | -2.110          | 0.586      | 0.410    | 0.176          | 0.996          | 0.349      | 0.826    | -0.477         | 1.175          |
| <b>FLG</b>      | 2.182       | 0.453     | 1.729           | 2.635           | -1.702     | 0.566    | -2.267         | -1.136         | -2.885     | 0.421    | -3.306         | -2.463         |
| <b>MX1</b>      | -3.778      | 0.707     | -4.485          | -3.070          | -3.657     | 0.836    | -4.493         | -2.822         | -1.805     | 0.768    | -2.573         | -1.037         |
| <b>S100A12</b>  | -10.155     | 0.861     | -11.016         | -9.294          | -6.811     | 0.749    | -7.560         | -6.062         | -5.928     | 0.599    | -6.528         | -5.329         |
| <b>STAT1</b>    | -4.079      | 0.675     | -4.755          | -3.404          | -2.819     | 0.393    | -3.212         | -2.426         | -1.888     | 0.638    | -2.525         | -1.250         |
| <b>DGAT2</b>    | -2.537      | 0.571     | -3.109          | -1.966          | -2.541     | 0.415    | -2.955         | -2.126         | -1.724     | 0.612    | -2.336         | -1.113         |
| <b>ELOVL5</b>   | -7.405      | 0.864     | -8.269          | -6.541          | -5.542     | 0.538    | -6.080         | -5.005         | -4.929     | 0.606    | -5.535         | -4.323         |
| <b>CCL22</b>    | 1.790       | 0.291     | 1.498           | 2.081           | 2.689      | 0.283    | 2.406          | 2.972          | 1.904      | 0.637    | 1.267          | 2.542          |
| <b>CD209</b>    | -10.901     | 0.440     | -11.340         | -10.461         | -8.083     | 0.860    | -8.943         | -7.223         | -6.433     | 0.663    | -7.096         | -5.770         |
| <b>LOR</b>      | 5.941       | 0.437     | 5.505           | 6.378           | 2.289      | 0.660    | 1.629          | 2.950          | 1.272      | 0.526    | 0.746          | 1.799          |
| <b>S100A7</b>   | -1.523      | 0.354     | -1.878          | -1.169          | 0.441      | 0.485    | -0.044         | 0.925          | 0.264      | 0.586    | -0.322         | 0.850          |
| <b>CLDN8</b>    | -15.847     | 1.171     | -17.018         | -14.676         | -          | 0.810    | -              | -              | -          | 1.055    | -              | -              |
|                 |             |           |                 |                 | 18.336     |          | 19.146         | 17.526         | 17.825     |          | 18.880         | 16.770         |

|                                |         |       |         |         |        |       |        |        |        |       |        |        |
|--------------------------------|---------|-------|---------|---------|--------|-------|--------|--------|--------|-------|--------|--------|
| <b>OX40L</b>                   | -16.646 | 0.513 | -17.159 | -16.133 | -      | 0.900 | -      | -      | -      | 0.838 | -      | -      |
|                                |         |       |         |         | 12.740 |       | 13.640 | 11.840 | 13.228 |       | 14.066 | 12.390 |
| <b>CCL4</b>                    | -5.014  | 0.950 | -5.964  | -4.065  | -3.458 | 0.856 | -4.314 | -2.602 | -2.100 | 0.747 | -2.846 | -1.353 |
| <b>CCR4</b>                    | -8.143  | 0.857 | -9.000  | -7.285  | -5.134 | 0.720 | -5.854 | -4.414 | -4.900 | 0.676 | -5.577 | -4.224 |
| <b>CD28</b>                    | -9.996  | 0.632 | -10.628 | -9.364  | -7.950 | 0.575 | -8.525 | -7.376 | -7.968 | 0.494 | -8.462 | -7.474 |
| <b>CD3</b>                     | -14.170 | 0.995 | -15.165 | -13.175 | -9.397 | 0.950 | -      | -8.447 | -8.879 | 0.719 | -9.598 | -8.160 |
|                                |         |       |         |         |        |       | 10.347 |        |        |       |        |        |
| <b>CD83</b>                    | -2.289  | 0.307 | -2.597  | -1.982  | -1.566 | 0.138 | -1.704 | -1.428 | -2.007 | 0.613 | -2.620 | -1.393 |
| <b>CERS3</b>                   | -5.885  | 0.438 | -6.323  | -5.447  | -5.483 | 0.441 | -5.924 | -5.042 | -6.338 | 0.562 | -6.900 | -5.776 |
| <b>CLDN23</b>                  | -8.870  | 0.682 | -9.553  | -8.188  | -      | 0.698 | -      | -      | -      | 0.624 | -      | -      |
|                                |         |       |         |         | 10.902 |       | 11.600 | 10.204 | 11.322 |       | 11.947 | 10.698 |
| <b>CSF2</b>                    | -18.079 | 0.965 | -19.044 | -17.114 | -      | 1.376 | -      | -      | -      | 1.076 | -      | -      |
|                                |         |       |         |         | 15.037 |       | 16.413 | 13.661 | 12.099 |       | 13.175 | 11.023 |
| <b>FAR2</b>                    | -6.654  | 0.590 | -7.243  | -6.064  | -7.647 | 0.563 | -8.210 | -7.083 | -7.569 | 0.516 | -8.085 | -7.054 |
| <b>FOXP3</b>                   | -9.692  | 0.755 | -10.446 | -8.937  | -7.098 | 0.870 | -7.969 | -6.228 | -5.905 | 0.477 | -6.381 | -5.428 |
| <b>ICOS</b>                    | -16.769 | 1.001 | -17.770 | -15.768 | -      | 1.007 | -      | -      | -      | 0.807 | -      | -      |
|                                |         |       |         |         | 11.387 |       | 12.393 | 10.380 | 11.286 |       | 12.093 | 10.479 |
| <b>IFN<math>\gamma</math></b>  | -18.757 | 0.730 | -19.487 | -18.026 | -      | 0.974 | -      | -      | -      | 0.890 | -      | -      |
|                                |         |       |         |         | 17.161 |       | 18.136 | 16.187 | 17.082 |       | 17.972 | 16.192 |
| <b>IL-1RA</b>                  | -0.306  | 0.305 | -0.611  | -0.000  | 0.566  | 0.321 | 0.245  | 0.887  | 1.488  | 0.318 | 1.170  | 1.806  |
| <b>IL-3RA</b>                  | -7.157  | 0.558 | -7.714  | -6.599  | -4.365 | 0.256 | -4.621 | -4.109 | -4.436 | 0.531 | -4.967 | -3.905 |
| <b>IL-10</b>                   | -14.176 | 0.610 | -14.785 | -13.566 | -      | 0.683 | -      | -9.366 | -9.386 | 0.470 | -9.856 | -8.916 |
|                                |         |       |         |         | 10.049 |       | 10.733 |        |        |       |        |        |
| <b>IL-13</b>                   | -14.209 | 0.766 | -14.974 | -13.443 | -      | 1.143 | -      | -      | -9.071 | 0.708 | -9.779 | -8.363 |
|                                |         |       |         |         | 12.134 |       | 13.278 | 10.991 |        |       |        |        |
| <b>IL-17C</b>                  | -13.642 | 0.834 | -14.476 | -12.808 | -      | 0.848 | -      | -      | -      | 0.740 | -      | -      |
|                                |         |       |         |         | 12.444 |       | 13.292 | 11.597 | 11.734 |       | 12.475 | 10.994 |
| <b>IL-19</b>                   | -16.178 | 1.072 | -17.250 | -15.105 | -      | 1.507 | -      | -      | -9.015 | 1.106 | -      | -7.909 |
|                                |         |       |         |         | 12.233 |       | 13.740 | 10.726 |        |       | 10.122 |        |
| <b>IL-1<math>\alpha</math></b> | -6.301  | 0.546 | -6.847  | -5.756  | -6.188 | 0.483 | -6.671 | -5.706 | -5.331 | 0.669 | -6.000 | -4.663 |
| <b>IL-1<math>\beta</math></b>  | -4.859  | 0.376 | -5.235  | -4.482  | -3.943 | 0.388 | -4.331 | -3.555 | -2.969 | 0.464 | -3.433 | -2.505 |
| <b>IL-2</b>                    | -18.041 | 0.324 | -18.366 | -17.717 | -      | 0.821 | -      | -      | -      | 0.622 | -      | -      |
|                                |         |       |         |         | 15.132 |       | 15.953 | 14.310 | 15.521 |       | 16.143 | 14.899 |
| <b>IL-2RA</b>                  | -9.755  | 0.941 | -10.696 | -8.813  | -6.312 | 0.861 | -7.172 | -5.451 | -5.492 | 0.609 | -6.101 | -4.883 |
| <b>IL-33</b>                   | -13.111 | 0.979 | -14.090 | -12.133 | -      | 0.853 | -      | -      | -      | 0.869 | -      | -      |
|                                |         |       |         |         | 15.278 |       | 16.130 | 14.425 | 12.506 |       | 13.375 | 11.637 |
| <b>IL-34</b>                   | -6.610  | 0.607 | -7.217  | -6.002  | -      | 0.963 | -      | -9.320 | -      | 1.045 | -      | -      |
|                                |         |       |         |         | 10.283 |       | 11.246 |        | 13.092 |       | 14.137 | 12.047 |
| <b>IL-36G</b>                  | -3.345  | 0.374 | -3.719  | -2.971  | -1.208 | 0.414 | -1.622 | -0.794 | -1.404 | 0.549 | -1.953 | -0.855 |
| <b>IL-37</b>                   | -1.722  | 0.355 | -2.077  | -1.367  | -4.604 | 0.647 | -5.251 | -3.957 | -5.877 | 0.829 | -6.707 | -5.048 |
| <b>IL-4</b>                    | -19.460 | 0.481 | -19.941 | -18.979 | -      | 0.883 | -      | -      | -      | 0.906 | -      | -      |
|                                |         |       |         |         | 16.844 |       | 17.727 | 15.961 | 15.196 |       | 16.101 | 14.290 |
| <b>IL-4R</b>                   | -4.287  | 0.439 | -4.726  | -3.849  | -2.996 | 0.230 | -3.227 | -2.766 | -3.076 | 0.482 | -3.558 | -2.594 |
| <b>IL-6</b>                    | -18.132 | 0.814 | -18.947 | -17.318 | -      | 1.292 | -      | -      | -      | 0.776 | -      | -9.485 |
|                                |         |       |         |         | 13.950 |       | 15.243 | 12.658 | 10.262 |       | 11.038 |        |
| <b>IL-8</b>                    | -0.283  | 0.333 | -0.615  | 0.050   | 1.404  | 0.433 | 0.971  | 1.838  | 2.373  | 0.490 | 1.883  | 2.863  |
| <b>K16</b>                     | -1.170  | 0.309 | -1.479  | -0.861  | -0.804 | 0.396 | -1.200 | -0.407 | -0.582 | 0.473 | -1.055 | -0.110 |
| <b>KLK5</b>                    | 1.044   | 0.287 | 0.757   | 1.331   | -1.383 | 0.491 | -1.874 | -0.891 | -1.950 | 0.360 | -2.310 | -1.591 |
| <b>KLK7</b>                    | -1.362  | 0.305 | -1.667  | -1.058  | -2.538 | 0.399 | -2.937 | -2.138 | -2.848 | 0.528 | -3.376 | -2.320 |
| <b>SCD</b>                     | -4.792  | 0.546 | -5.338  | -4.246  | -6.120 | 0.573 | -6.693 | -5.546 | -6.296 | 0.452 | -6.748 | -5.844 |
| <b>IL-12/IL-23p40</b>          | -15.413 | 0.843 | -16.256 | -14.570 | -      | 1.199 | -      | -      | -      | 0.886 | -      | -      |
|                                |         |       |         |         | 12.914 |       | 14.113 | 11.715 | 11.097 |       | 11.983 | 10.212 |
| <b>IL-23p19</b>                | -14.762 | 1.140 | -15.902 | -13.622 | -9.042 | 1.193 | -      | -7.849 | -7.671 | 0.710 | -8.381 | -6.960 |
|                                |         |       |         |         |        |       | 10.234 |        |        |       |        |        |

SE, standard error; CI, confidence interval; NL, nonlesional; LS, lesional; AD, atopic dermatitis.

**eFigure 1. Gene Expression of Inflammatory Biomarkers in Tape Strips**

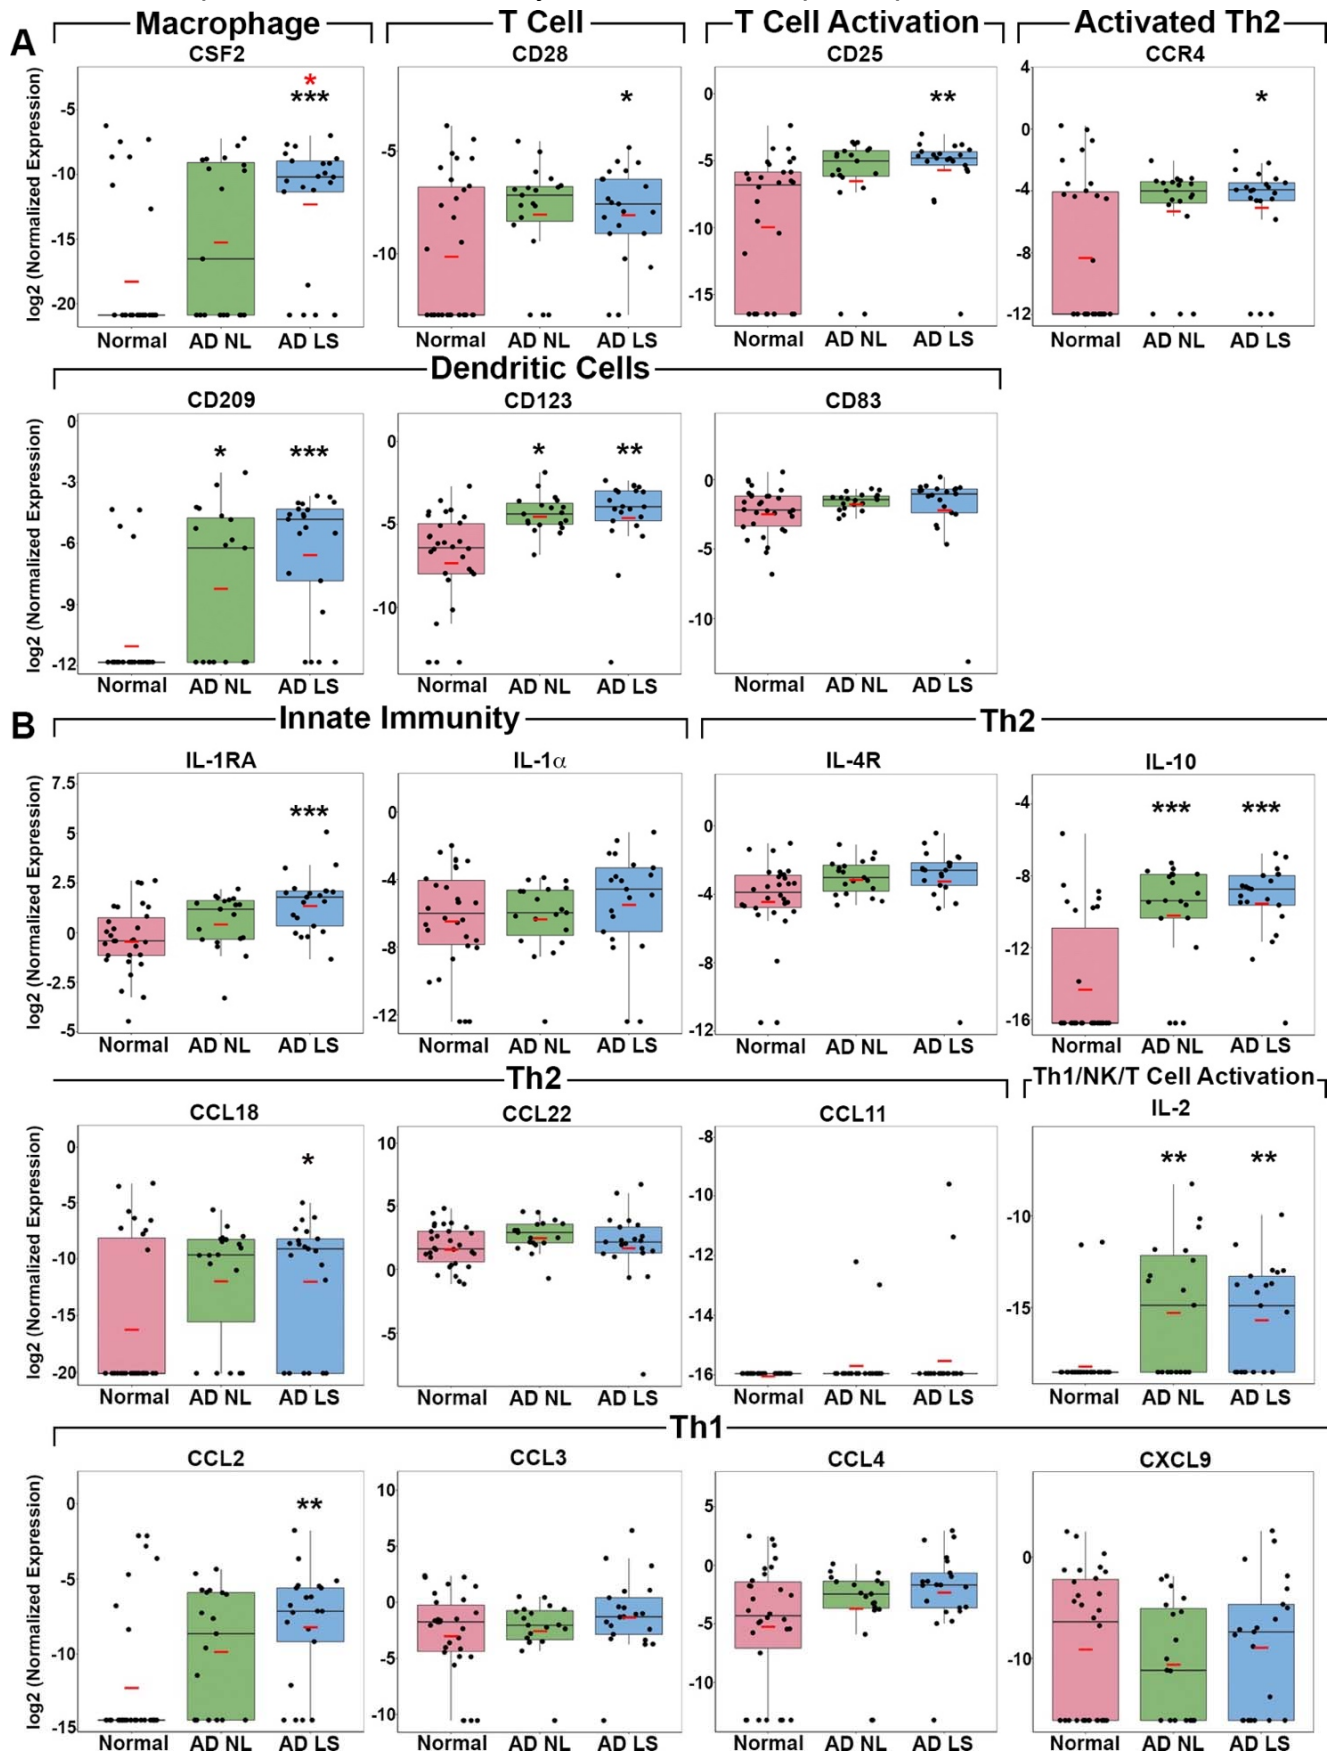

Additional cellular markers detected in tape-strips in normal, AD nonlesional (NL), and AD lesional skin (LS) (A). Multiple immune axes biomarkers detected in tape-strips (B). \* $P < 0.05$ ; \*\* $P < 0.01$ ; \*\*\* $P < 0.001$ . *Black stars*: significance of comparison between AD skin and normal skin; *red stars*: significance of comparison between AD lesional skin versus nonlesional skin.

**eFigure 2. Immune and Barrier AD Biomarkers Detected in Tape Strips**

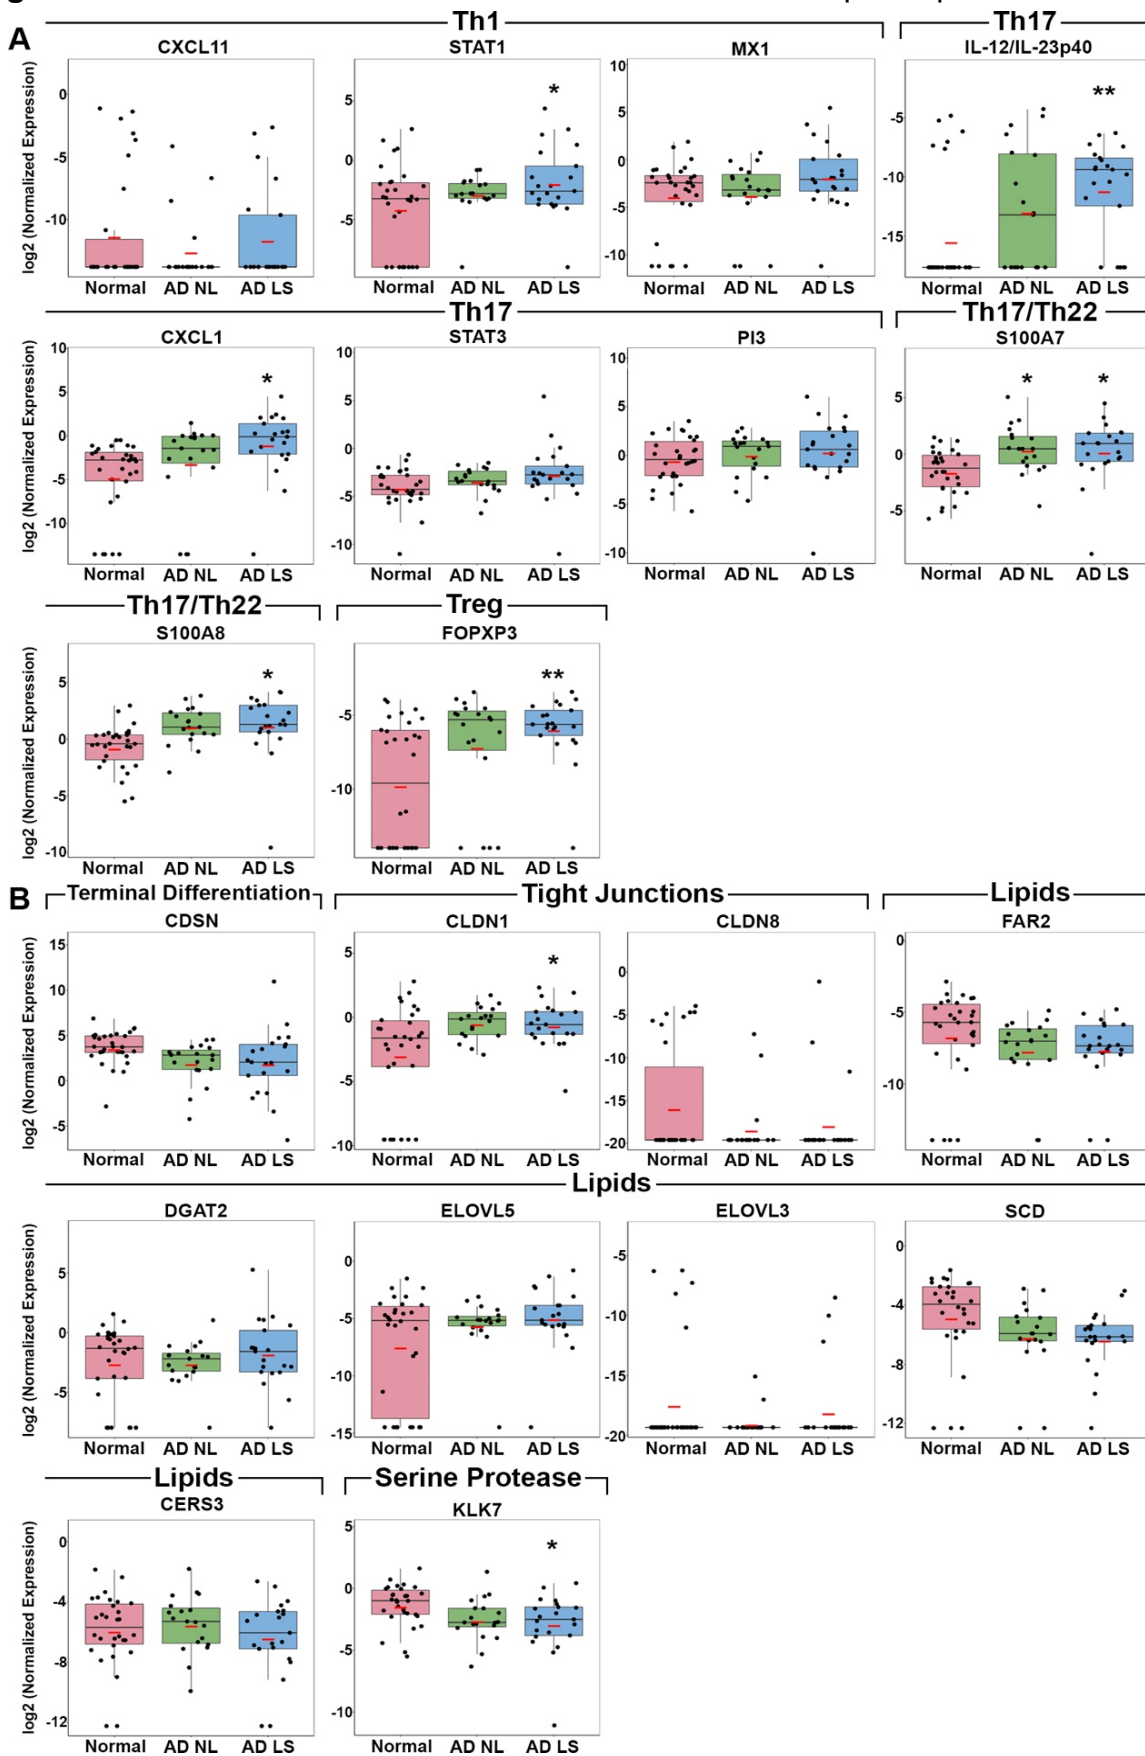

Additional immune biomarkers show differences in normal, AD nonlesional (NL), and AD lesional skin (LS) using tape-strips (A). Additional barrier biomarkers detected in tape-strips across AD tissues versus normal skin (B). \* $P < 0.05$ ; \*\* $P < 0.01$ ; \*\*\* $P < 0.001$ . Black stars: significance of comparison between AD skin and normal skin.

**eFigure 3. Histology**

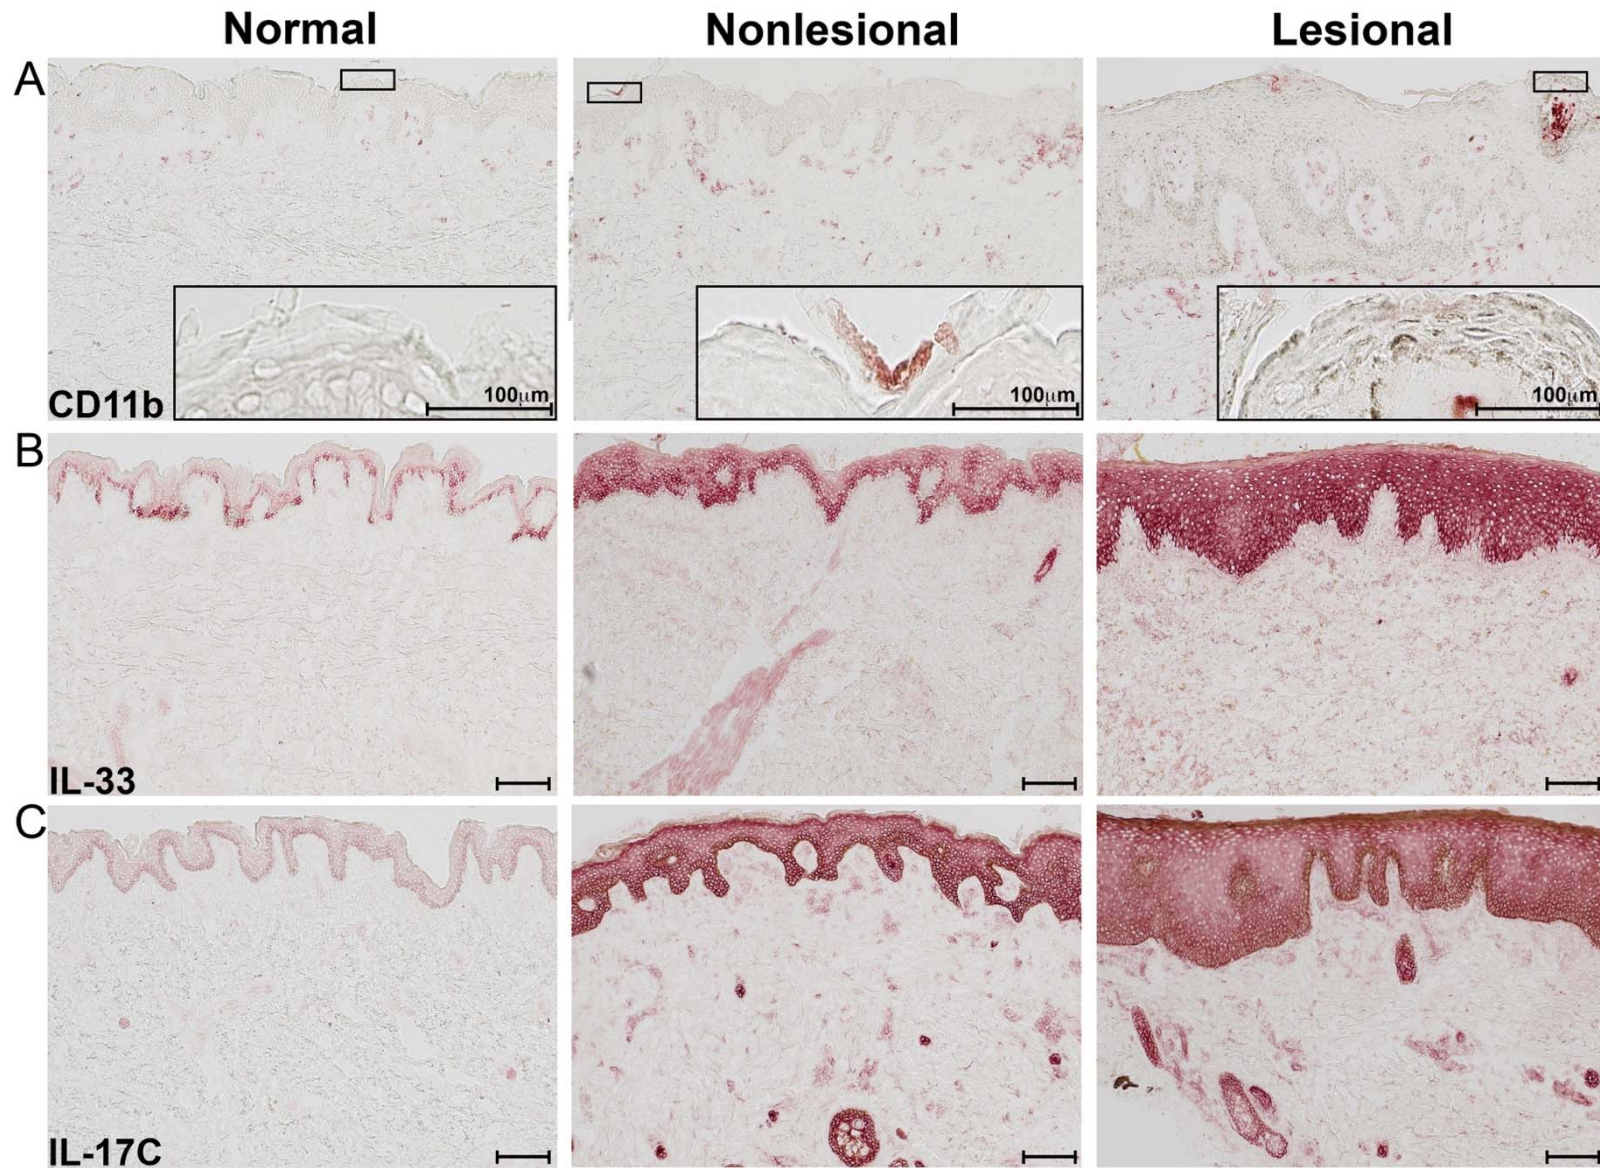

Representative immunohistochemistry staining, 10x magnification, in pediatric patients with AD and control subjects of CD11b (A), IL-33 (B), and IL-17C (C). 40x magnification inserts illustrates absence or presence of CD11b+ cellular infiltrates in outer epithelial layers in normal, nonlesional, and lesional AD skin (A).

**eFigure 4. Expression of Biomarkers in Tape Strips Correlates With Clinical Severity**

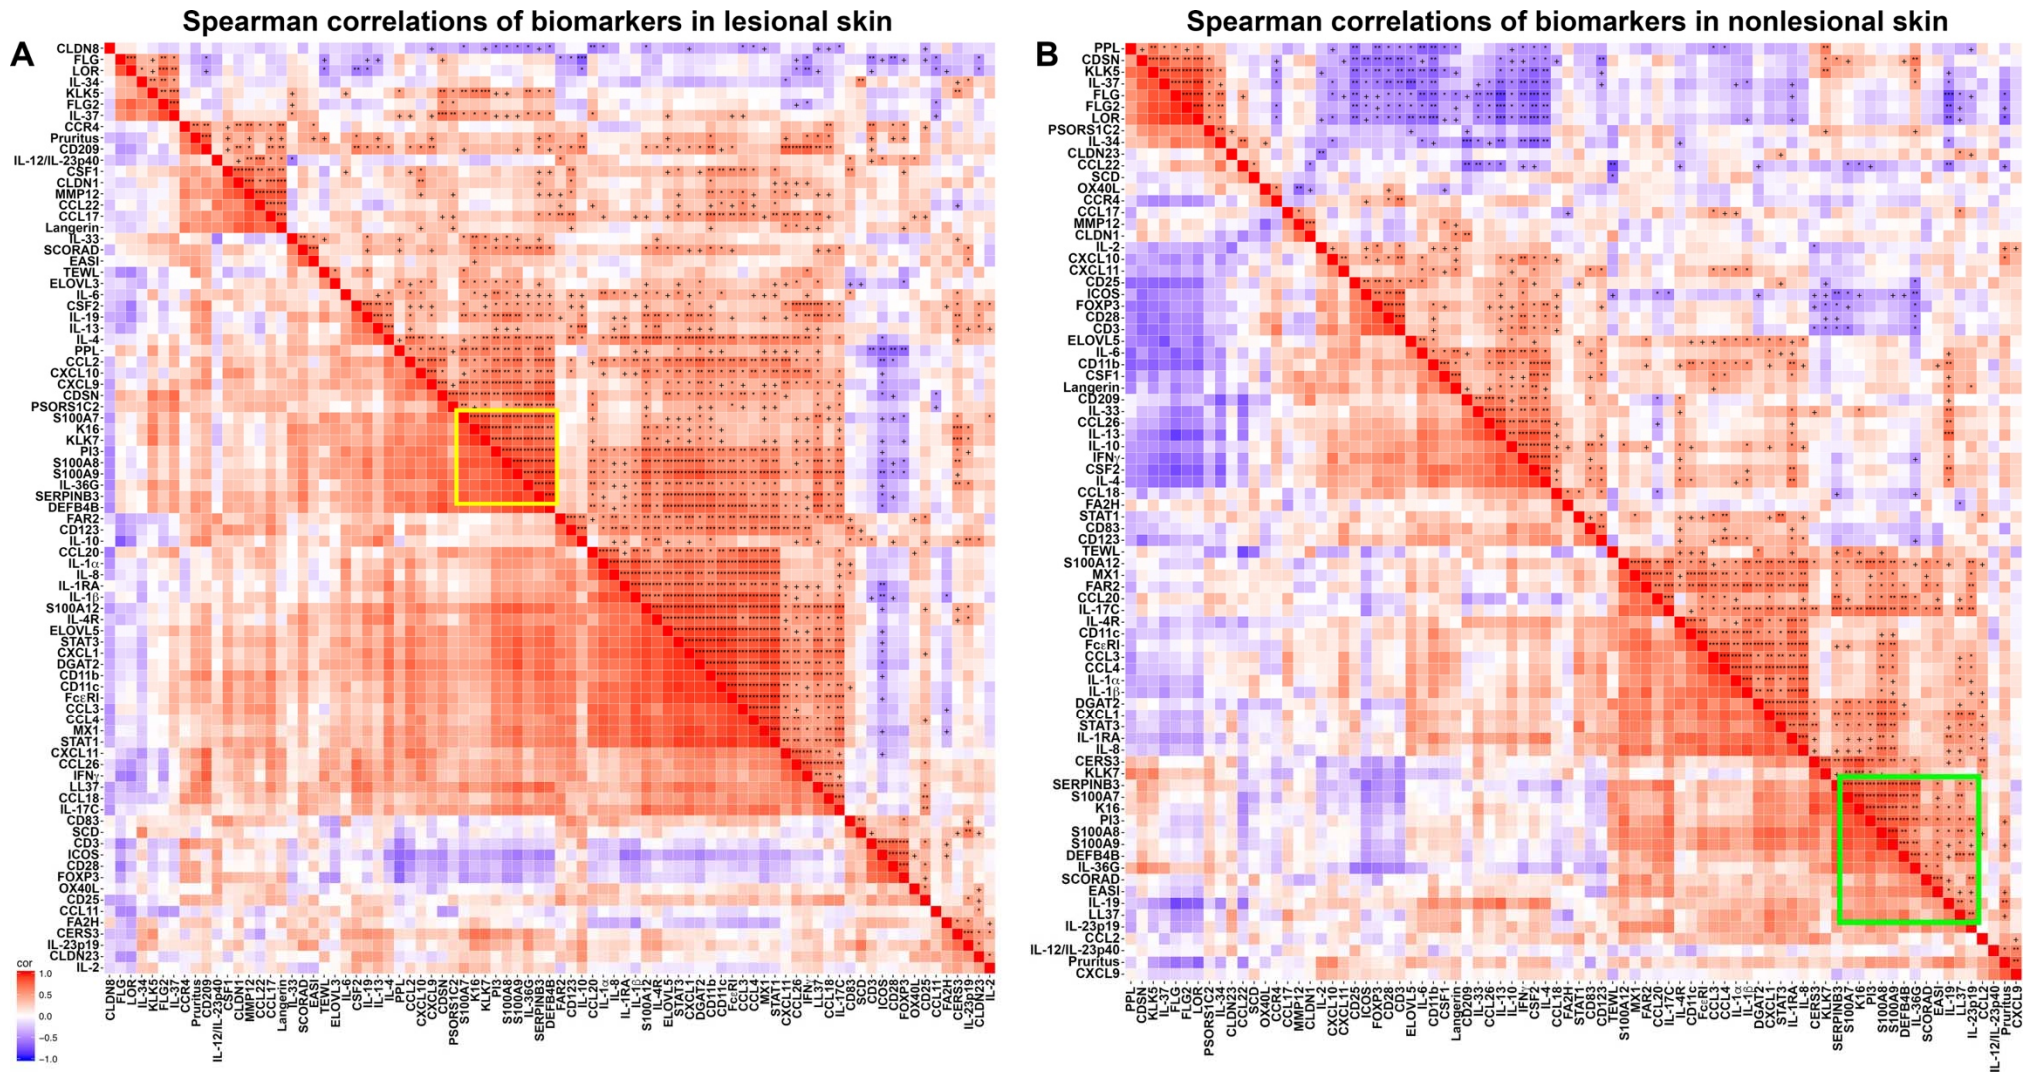

Heatmap of Spearman correlation matrix of measured values in pediatric AD lesional skin using tape-strips (A). *Yellow box* denotes Th17/Th22 cluster. Heatmap of Spearman correlation matrix of measured values in pediatric AD nonlesional skin using tape-strips (B). *Green box* denotes Th17/Th22 cluster. Horizontal rows for each marker show shades of blue-violet for negative correlations and white-red for positive correlations. \* $P < 0.05$ ; \*\* $P < 0.01$ ; \*\*\* $P < 0.001$



**eFigure 5.** Receiver Operating Characteristic Area Under the Curve (ROC AUC) in Tape Strips

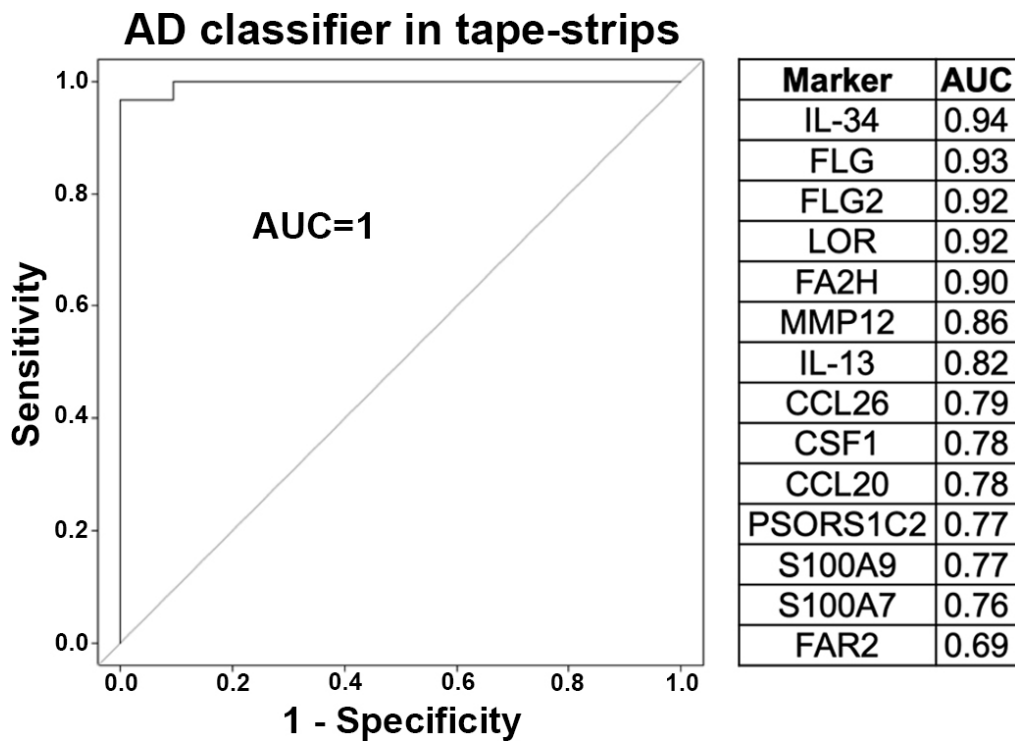

An integrated classifier of immune markers and skin barrier genes accurately discriminates AD and normal patients (AUC=1). The AUC values of single gene classifiers are provided in a table.

## eReferences

1. Kelleher MM, Dunn-Galvin A, Gray C, Murray DM, Kiely M, Kenny L, et al. Skin barrier impairment at birth predicts food allergy at 2 years of age. *J Allergy Clin Immunol*. 2016;137(4):1111-6.e8. doi:10.1016/j.jaci.2015.12.1312.
